# Supplementary material for: Yeast cohesin complex embraces 2 micron plasmid sisters in a tri-linked catenane complex
Source: PubMed Central journal article supplement — Nucleic Acids Res. 2009 Nov 17;38(2):570–84. doi: 10.1093/nar/gkp993 (PMC2811031; doi:10.1093/nar/gkp993), 2009-11-17
Supplement: gkp993_1.pdf [file gkp993_1.pdf]

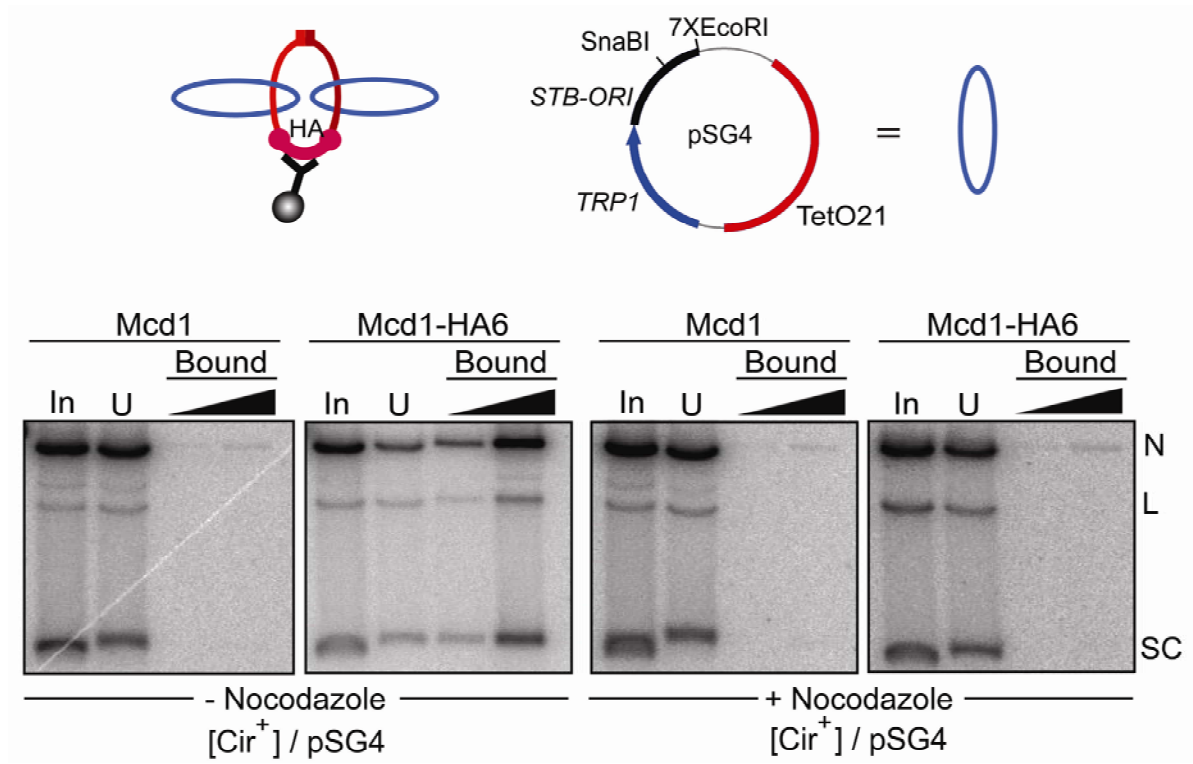

**Figure S1.** Spindle dependence of cohesin association with the *STB* reporter plasmid pSG4. As was established by the data in Figure 1, plasmid pSG4 associated with cohesin-HA6 could be immunoprecipitated from cell extracts with the HA-antibody. Cleared lysates from pGS4 containing metaphase [*cir*<sup>+</sup>] cells obtained by *cdc20* arrest or nocodazole treatment were immunoprecipitated with the HA-antibody, and adsorbed on Protein A beads. Aliquots of DNA extracted from the different fractions were analyzed as in Fig. 1C. In = input; U = unbound or flow-through. The amount of ‘bound’ DNA loaded in the right lane was 5 times that in the left one. This was also the case for Figures S2 and S3. SC = supercoiled plasmid; L = linear plasmid; N = nicked plasmid. Note that pSG4 was not pulled down by the HA-antibody when Mcd1 did not harbor the HA-tag or when cells were treated with nocodazole.

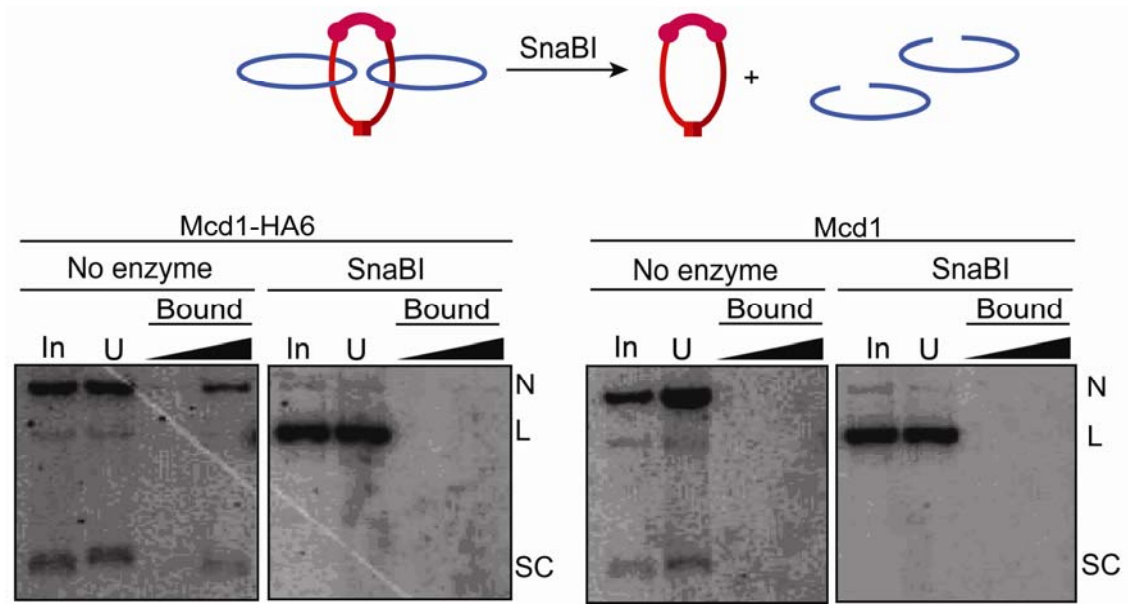

**Figure S2.** The *STB* reporter plasmid pGS4 is dissociated from cohesin upon linearizing the DNA. The data shown are from an assay analogous to that depicted in Figure 2B. SnaBI digestion, performed using a profligate excess of the enzyme (three times the amount used in a standard assay), in the cleared lysate from metaphase cells went to near completion in this assay. Immunoprecipitation using HA-antibody was conducted following DNA linearization.

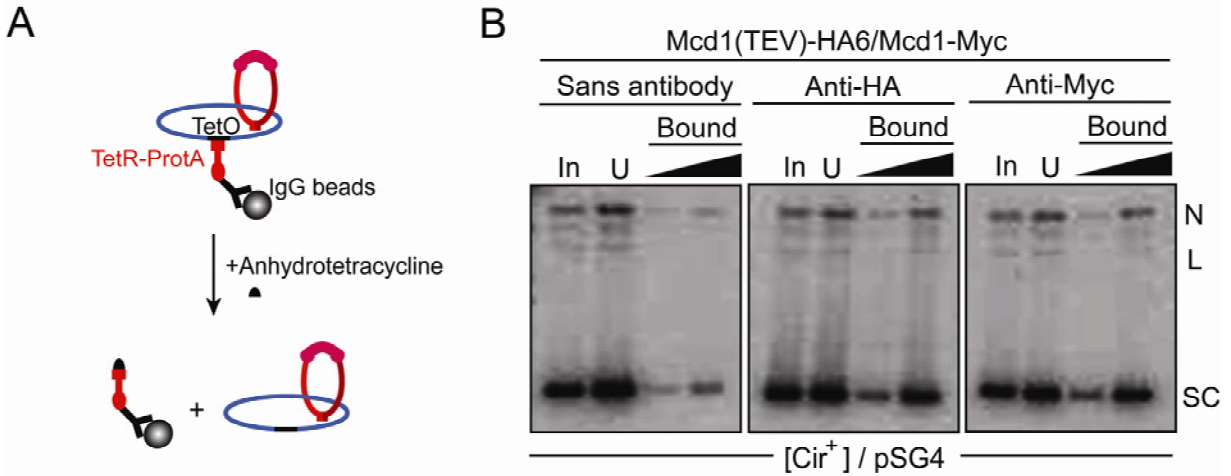

**Figure S3.** Initial trapping of pSG4 on IgG beads followed by release and subsequent immunoprecipitation by HA- or Myc-antibody. **A.** pSG4 from metaphase cells expressing cohesin-HA6 and cohesin-Myc13 was first adsorbed on IgG beads. The interaction between the TetO sequences on pSG4 and IgG was mediated through the hybrid repressor Protein A-TetR. The bound DNA was then released by the action of anhydrotetracycline. **B.** The supernatant was treated with the HA- or Myc-antibody, and the immunoprecipitates collected on Protein A beads.

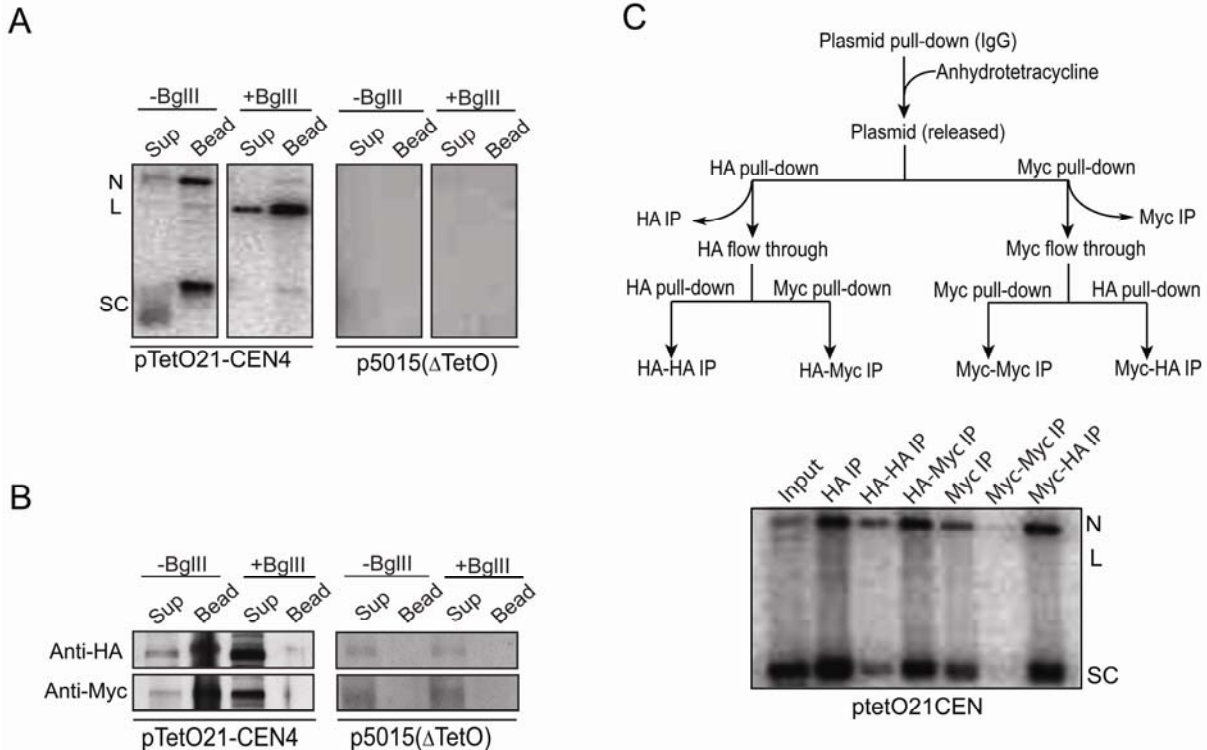

**Figure S4.** Outcomes of two-step immunoprecipitations performed on a circular minichromosome first adsorbed on IgG beads via Protein A-TetR-TetO interaction and then released by treatment with anhydrotetracycline. These assays were performed on the minichromosome pTetO21-CEN4 described by Ivanov et al (1) as a reference for similar assays performed on pSG4 (see Figure 4). **A, B.** Cleared lysates were incubated with IgG beads to bait plasmid DNA bound by Protein A-Tet repressor. Southern or western analysis was performed to examine the association of plasmid DNA or cohesin, respectively, with the beads in the absence of, or following, BglII digestion. **C.** The scheme for plasmid pull-down by IgG, release by anhydrotetracycline and subsequent two-step immunoprecipitation of cohesin-associated plasmid DNA is shown at the top; the experimental results are displayed below. Note that the HA-antibody immunodepleted cohesin(Mcd1-HA6) but not cohesin(Mcd1-Myc13). The Myc-antibody yielded the reciprocal exclusion. This outcome was similar to that observed for the *STB*

reporter plasmid pSG4 (Figure 4). These findings are consistent with cohesion being mediated by a single monomeric ring of cohesin. Plasmid pairing by a cohesin bracelet or via embrace by more than one cohesin monomer should have resulted in cross-immunodepletion by the HA- or Myc-antibody.

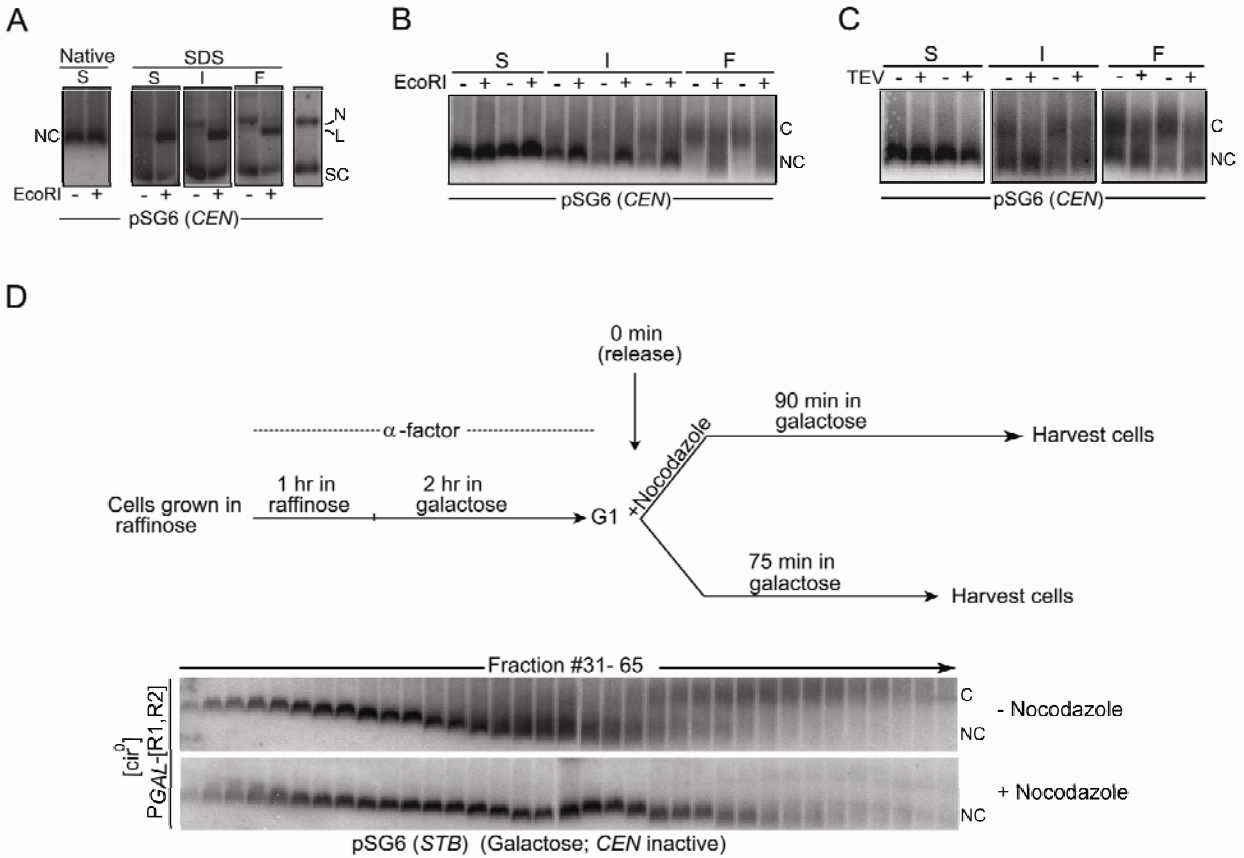

**Figure S5.** Analysis of cohesion in pSG6(CEN) by sucrose gradient sedimentation followed by EcoRI and TEV protease digestion: nocodazole abolishes cohesion in pSG6(STB). For details of the sedimentation procedure and subsequent analysis, see Figure 5 and the relevant text under ‘Results’. Data shown in A-C represent the third panel from the top in Figure 5B (pSG6: [cir<sup>0</sup>]; glucose). **A.** EcoRI digestion did not change the mobility of the slow-sedimenting (S) fractions during agarose gel electrophoresis under native conditions. When slow-, intermediate- (I) and fast-sedimenting (F) fractions were reanalyzed after SDS treatment, the DNA migrated essentially as the monomeric form, supercoiled circles primarily along with a small fraction ( $\leq 20\%$ ) of nicked circles. Gradient fractions digested with EcoRI at 4°C prior to SDS treatment and agarose electrophoresis revealed the majority of plasmids in the linear form. The extent of

enzyme digestion was 60-70%. DNA extracted from the cleared lysate of metaphase cells by phenol-chloroform treatment and ethanol precipitation was run in the rightmost lane as a control. C = cohesed plasmid; NC = non-cohesed plasmid; SC = supercoiled plasmid; N = nicked plasmid; L = linear plasmid. **B**, **C**. Either EcoRI digestion (**B**) or TEV protease cleavage (**C**) resulted in the conversion of the cohesed form to the non-cohesed form, as revealed by native agarose gel electrophoresis. **D**. G1-arrested cells were conditioned in galactose (as in Figure 5) and released into the cell cycle in galactose medium lacking or containing nocodazole. Metaphase cells from the nocodazole-free medium were harvested at 75 min after release (see also Figure 5A), and from nocodazole containing medium at 90 min. The G2/M arrest induced by nocodazole was ~90%. Cleared cell lysates were subjected to sucrose gradient sedimentation, and fractions were probed for cohesed and non-cohesed forms of pSG6.

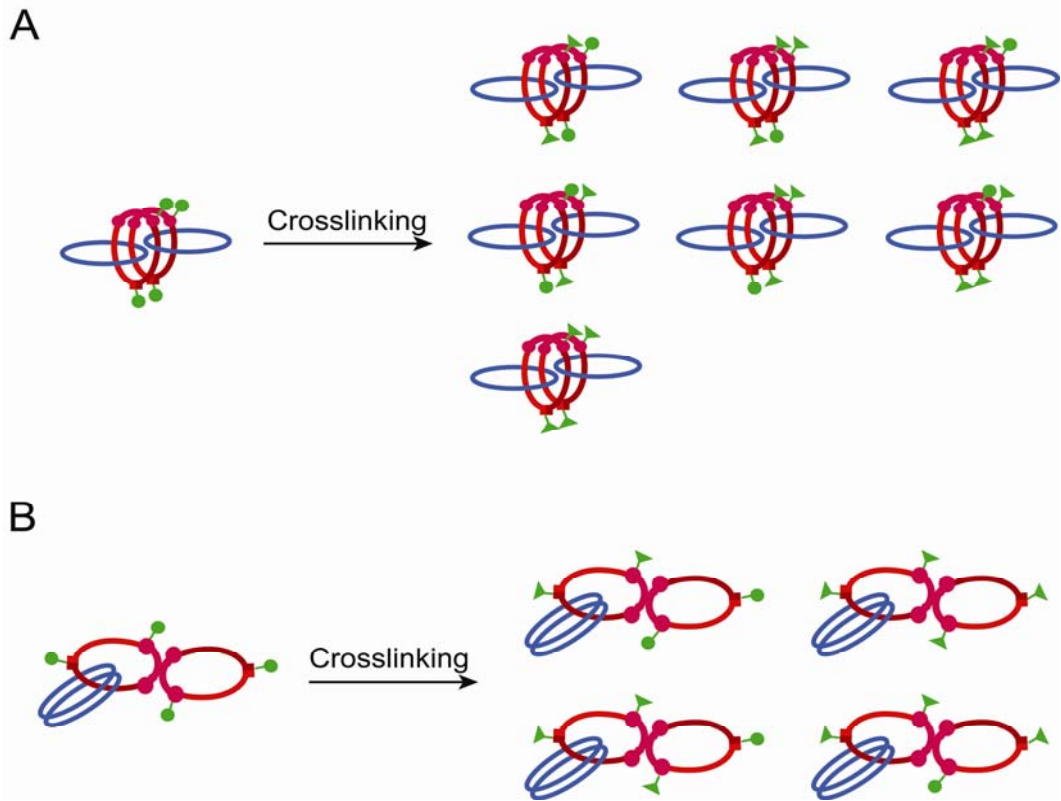

**Figure S6.** Ruling out two or more copies of a monomeric cohesin ring around minichromosome sisters. In the study by Haering et al. (2), formation of a covalently closed ring of a cohesin monomer required crosslinking two pairs of cysteines (green circles) to form chemical bridges (green triangles) between them. The probability of crosslinking a cysteine pair ‘p’ was ~55% (see Figure 6). **A.** For the case of two monomeric cohesin rings formed around sister minichromosomes, the probability of their SDS-resistant entrapment by crosslinking  $P = 1 - [1 - p^2]^2 = 51\%$ . Two crosslinks formed in either cohesin ring or both rings will entrap DNA sisters. **B.** For the cohesin hand-cuff, physical or topological, with DNA sisters confined to one ring alone,  $P = p^2 = 30\%$ . The observed value for  $P = 30\% = p^2$  is consistent with a monomeric cohesin ring or only one of the two hand-cuff rings entrapping both DNA sisters. It is inconsistent with two or more monomeric cohesin rings surrounding the DNA sisters.



**Table S1. The yeast strains used for this study and their genotypes are listed.**

| Strain  | Genotype                                                                                                                                      | Reference                                 |
|---------|-----------------------------------------------------------------------------------------------------------------------------------------------|-------------------------------------------|
| MAY5402 | <i>MATa his3 ura3 ade2 trp1 leu2 bar1 cdc20-1</i> [Cir <sup>+</sup> ]                                                                         | <sup>(3)</sup> Hildebrandt and Hoyt, 2001 |
| K11282  | <i>MATa ade2-1 trp1-1 can1-100 leu2-3, 112 his3 ura3 scc1::SCC1-6HA::HIS3, ProtA-TetR::LEU2</i> [Cir <sup>+</sup> ]                           | <sup>(1)</sup> Ivanov and Nasmyth, 2005   |
| K11580  | <i>MATa ade2-1 trp1-1 can1-100 leu2-3 112 his3 ura3 scc1::SCC1(TEV3)-6HA::HIS3 ProtA-TetR::LEU2</i> [Cir <sup>+</sup> ]                       | <sup>(1)</sup> Ivanov and Nasmyth, 2005   |
| MJY4258 | <i>MATa ade2 trp1 his3 leu2 ura3 scc1::SCC1-6HA::KAN ProtA-TetR::LEU2</i> [Cir <sup>+</sup> ]                                                 | This study                                |
| MJY4293 | <i>MATa ade2 trp1-1 his3 leu2 ura3 scc1::SCC1-6HA::HIS3 ProtA-TetR::LEU2 cdc20-1</i> [Cir <sup>+</sup> ]                                      | This study                                |
| MJY4294 | <i>MATa ade2 trp1-1 his3 leu2 ura3 scc1::SCC1(TEV3)-6HA::HIS3 ProtA-TetR::LEU2 cdc20-1</i> [Cir <sup>+</sup> ]                                | This study                                |
| MJY4292 | <i>MATa ade2 trp1-1 his3 leu2 ura3 scc1::SCC1(TEV3)-6HA::HIS3 ProtA-TetR::LEU2 cdc20-1</i> [Cir <sup>0</sup> ]                                | This study                                |
| MJY4319 | <i>MATa/a CDC20/cdc20-1 ProtA-TetR::LEU2 scc1::SCC1-13Myc::KAN/scc1::SCC1(TEV3)-6HA::HIS3 trp1-1/trp1-1</i> [Cir <sup>+</sup> , pTetO21CEN4]  | This study                                |
| MJY4324 | <i>MATa/a cdc20-1/cdc20-1 ProtA-TetR::LEU2 scc1::SCC1-13Myc::KAN/scc1::SCC1(TEV3)-6HA::HIS3 trp1-1/trp1-1</i> [Cir <sup>+</sup> , pSG4]       | This study                                |
| MJY5626 | <i>MATa ade2-1 trp1-1 can1-100 leu2-3, 112 his3 ura3 scc1::SCC1(TEV3)-6HA::HIS3 ProtA-TetR::LEU2</i> [Cir <sup>0</sup> , pSG6]                | This study                                |
| MJY5627 | <i>MATa ade2-1 trp1-1 can1-100 leu2-3, 112 his3 scc1::SCC1(TEV3)-6HA::HIS3 ProtA-TetR::LEU2 GAL-Rep1+Rep2::URA3</i> [Cir <sup>0</sup> , pSG6] | This study                                |

## References

1. Ivanov, D. and Nasmyth, K. (2005) A topological interaction between cohesin rings and a circular minichromosome. *Cell*, **122**, 849-860.
2. Haering, C.H., Farcas, A.M., Arumugam, P., Metson, J. and Nasmyth, K. (2008) The cohesin ring concatenates sister DNA molecules. *Nature*, **454**, 297-301.
3. Hildebrandt, E.R. and Hoyt, M.A. (2001) Cell cycle-dependent degradation of the *Saccharomyces cerevisiae* spindle motor Cin8p requires APC(Cdh1) and a bipartite destruction sequence. *Mol Biol Cell*, **12**, 3402-3416.
